# Supplementary material for: Synthesis, band structure and photocatalytic properties of Sillén–Aurivillius oxychlorides BaBi5Ti3O14Cl, Ba2Bi5Ti4O17Cl and Ba3Bi5Ti5O20Cl with triple-, quadruple- and quintuple-perovskite layers
Source: Royal Society of Chemistry journal article supplement (doi:10.1039/d0ta12550d), 2021-01-01
Supplement: d0ta12550d1.pdf [file d0ta12550d1.pdf]

## **Supplementary Information**

### **Synthesis, band structure and photocatalytic property of Sillén–Aurivillius oxychlorides $\text{BaBi}_5\text{Ti}_3\text{O}_{14}\text{Cl}$ , $\text{Ba}_2\text{Bi}_5\text{Ti}_4\text{O}_{17}\text{Cl}$ and $\text{Ba}_3\text{Bi}_5\text{Ti}_5\text{O}_{20}\text{Cl}$ with triple-, quadruple- and quintuple-perovskite layers**

Daichi Ozaki,<sup>ab</sup> Hajime Suzuki,<sup>a</sup> Kanta Ogawa,<sup>ab</sup> Ryota Sakamoto,<sup>a</sup> Yoshiyuki Inaguma,<sup>c</sup> Kouichi Nakashima,<sup>d</sup> Osamu Tomita,<sup>a</sup> Hiroshi Kageyama<sup>\*a</sup> and Ryu Abe<sup>\*ab</sup>

<sup>a</sup>*Department of Energy and Hydrocarbon Chemistry, Graduate School of Engineering, Katsura, Kyoto University, Nishikyo-ku, Kyoto 615-8510, Japan*

<sup>b</sup>*AIST-Kyoto University Chemical Energy Materials Open Innovation Laboratory (ChEM-OIL), National Institute of Advanced Industrial Science and Technology (AIST), Yoshida, Sakyo-ku, Kyoto 606-8501, Japan*

<sup>c</sup>*Department of Chemistry, Faculty of Science, Gakushuin University, Toshima-ku, Tokyo 171-8588, Japan*

<sup>d</sup>*Department of Materials Science and Engineering, Graduate School of Science and Engineering, Ibaraki University, 4-12-1, Nakanarusawa, Hitachi, Ibaraki 316-8511, Japan*

#### **Corresponding Authors**

\*kage@scl.kyoto-u.ac.jp (H.K.); ryu-abe@scl.kyoto-u.ac.jp (R.A.)

**This supporting information presents the following contents.**

Supporting Figures S1–S20

Supporting Tables S1–S7

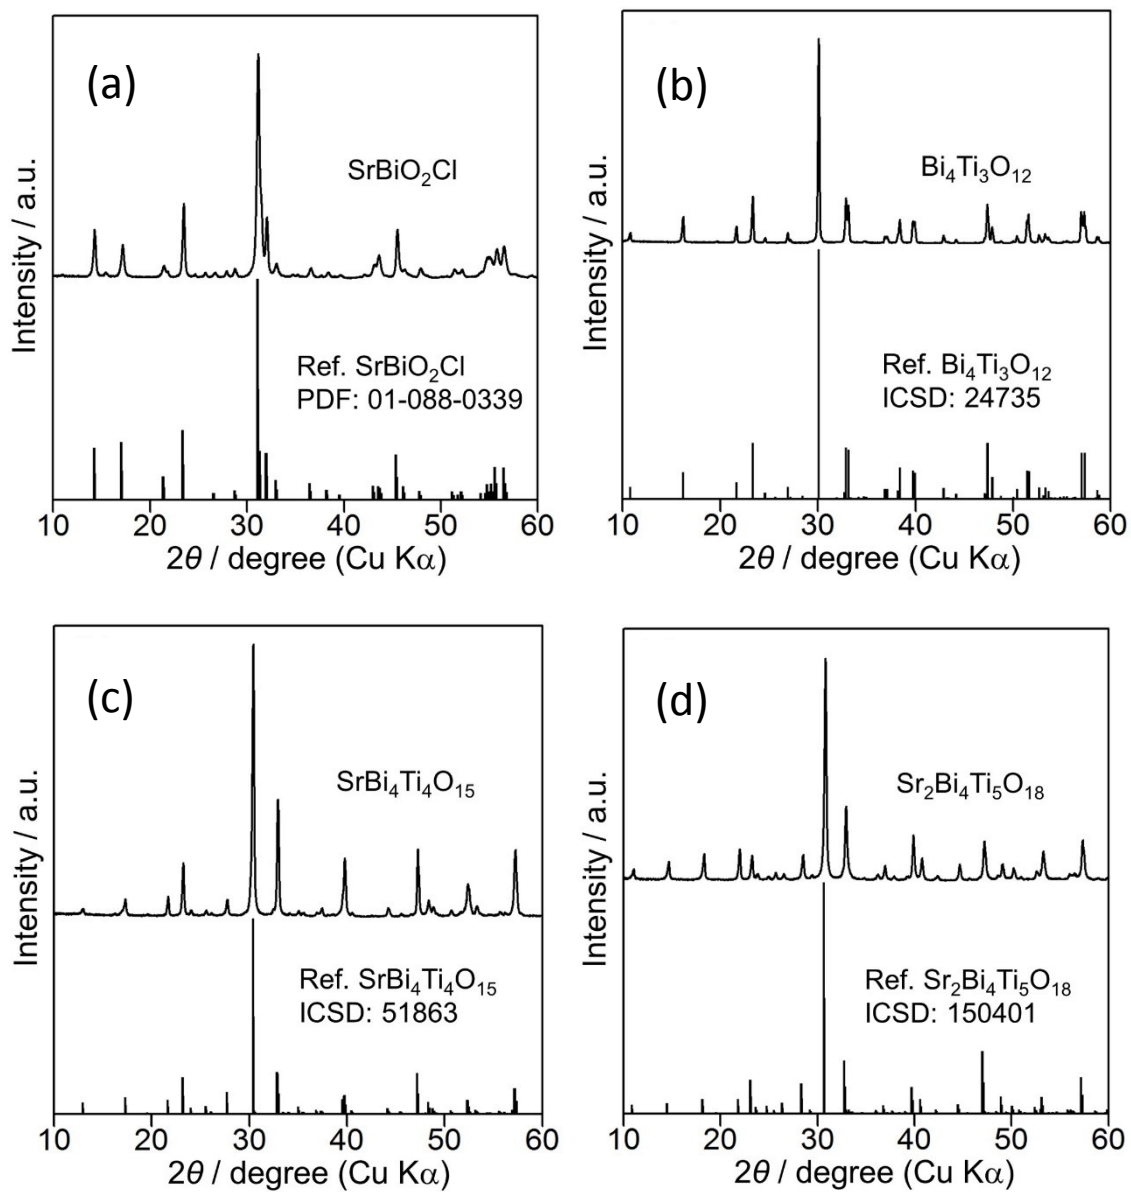

**Fig. S1** XRD patterns of (a)  $\text{SrBiO}_2\text{Cl}$ , (b)  $\text{Bi}_4\text{Ti}_3\text{O}_{12}$ , (c)  $\text{SrBi}_4\text{Ti}_4\text{O}_{15}$  and (d)  $\text{Sr}_2\text{Bi}_4\text{Ti}_5\text{O}_{18}$ .

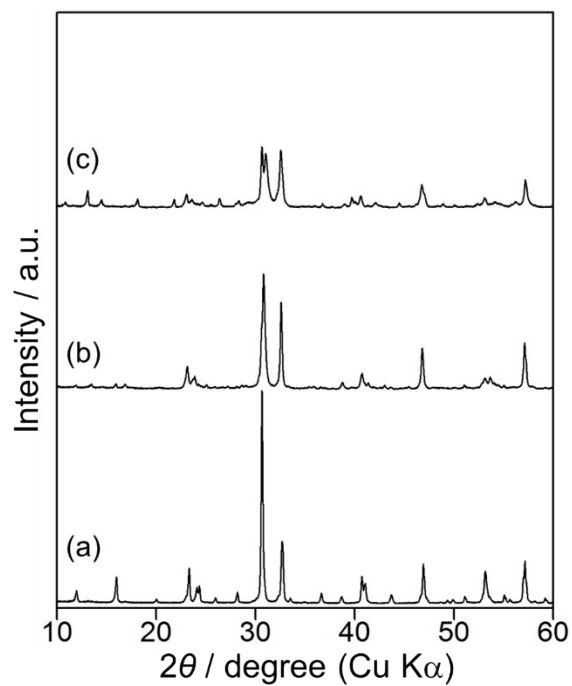

**Fig. S2** Laboratory XRD patterns of Sr-containing Sillén–Aurivillius compounds. (a)  $\text{Bi}_5\text{SrTi}_3\text{O}_{14}\text{Cl}$  ( $n = 3$ ), (b)  $\text{Bi}_5\text{Sr}_2\text{Ti}_4\text{O}_{17}\text{Cl}$  ( $n = 4$ ) and (c)  $\text{Bi}_5\text{Sr}_3\text{Ti}_5\text{O}_{20}\text{Cl}$  ( $n = 5$ ). Note that (b) and (c) are not fully crystallized.

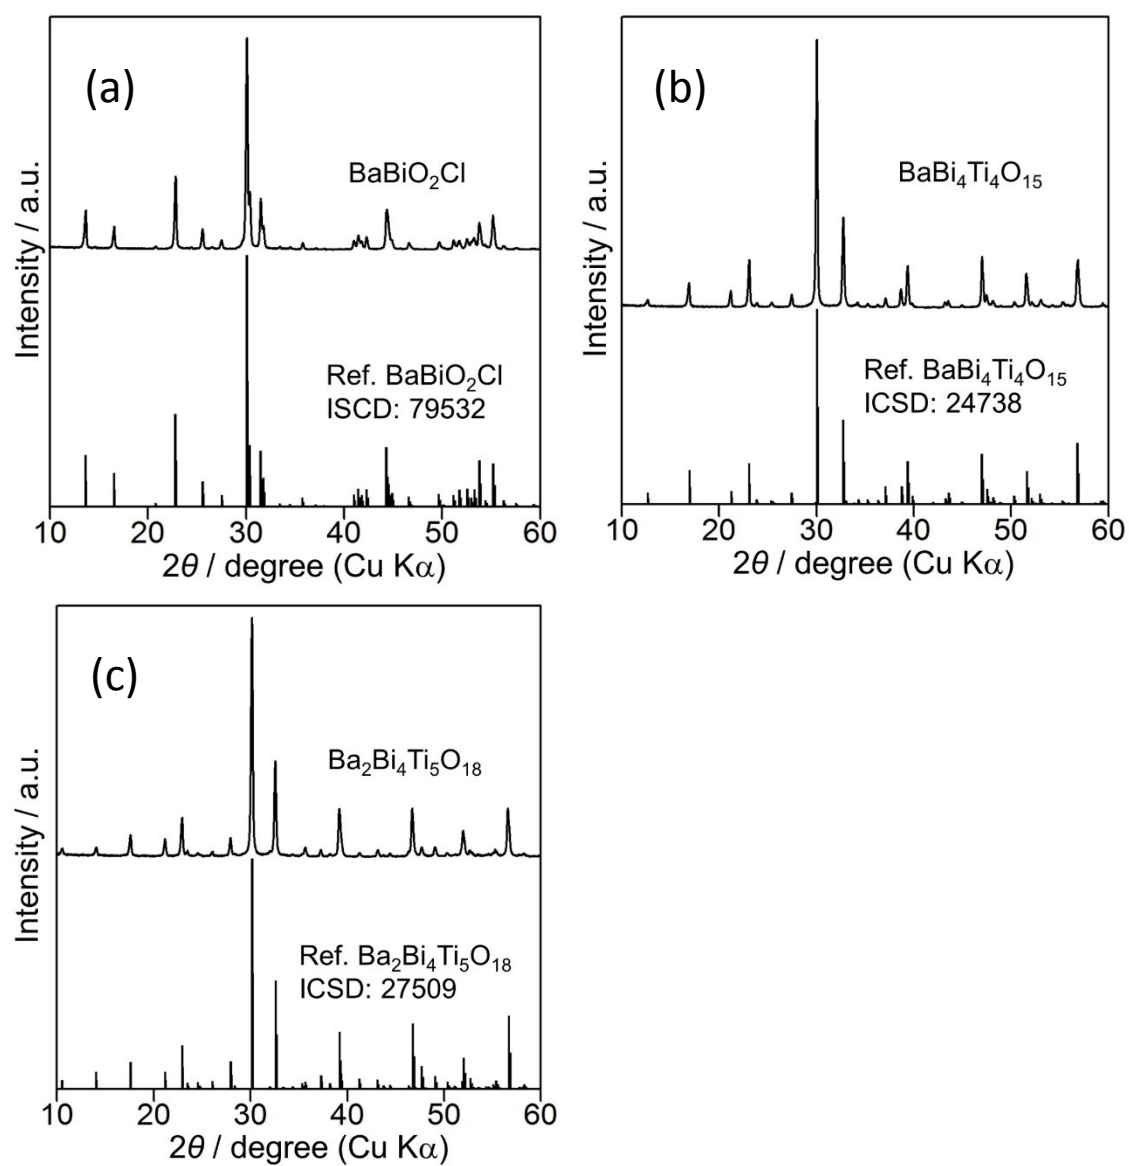

**Fig. S3** XRD patterns of (a) BaBiO<sub>2</sub>Cl, (b) BaBi<sub>4</sub>Ti<sub>4</sub>O<sub>15</sub> and (c) Ba<sub>2</sub>Bi<sub>4</sub>Ti<sub>5</sub>O<sub>18</sub>.

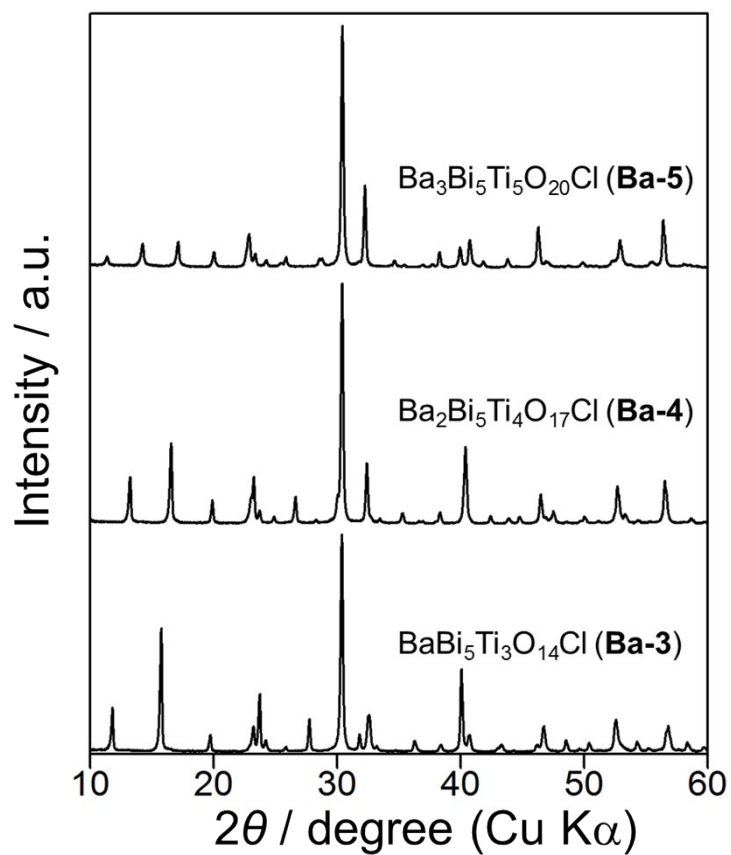

**Fig. S4** Laboratory XRD patterns of BaBi<sub>5</sub>Ti<sub>3</sub>O<sub>14</sub>Cl (**Ba-3**), Ba<sub>2</sub>Bi<sub>5</sub>Ti<sub>4</sub>O<sub>17</sub>Cl (**Ba-4**) and Ba<sub>3</sub>Bi<sub>5</sub>Ti<sub>5</sub>O<sub>20</sub>Cl (**Ba-5**).

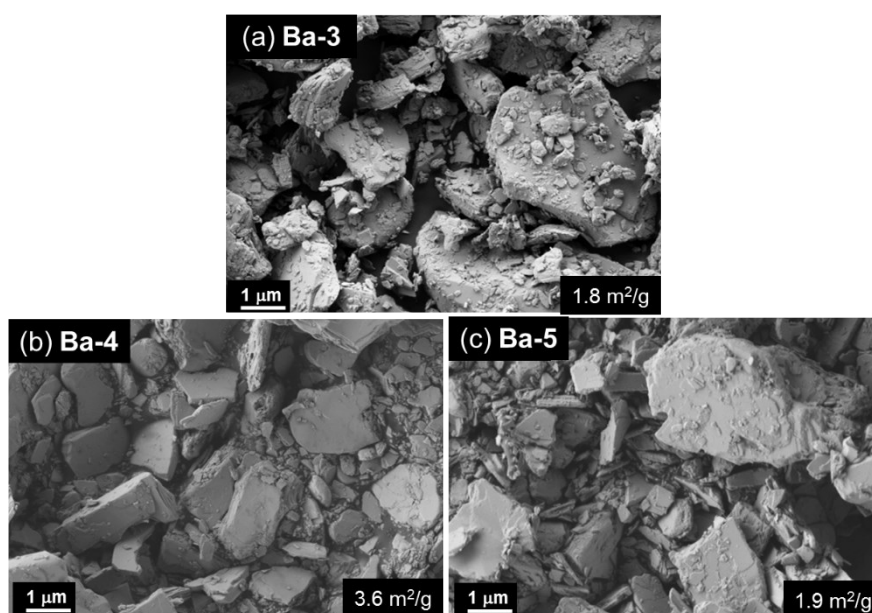

**Fig. S5** SEM images of BaBi<sub>5</sub>Ti<sub>3</sub>O<sub>14</sub>Cl (**Ba-3**), Ba<sub>2</sub>Bi<sub>5</sub>Ti<sub>4</sub>O<sub>17</sub>Cl (**Ba-4**) and Ba<sub>3</sub>Bi<sub>5</sub>Ti<sub>5</sub>O<sub>20</sub>Cl (**Ba-5**) and their specific surface areas.

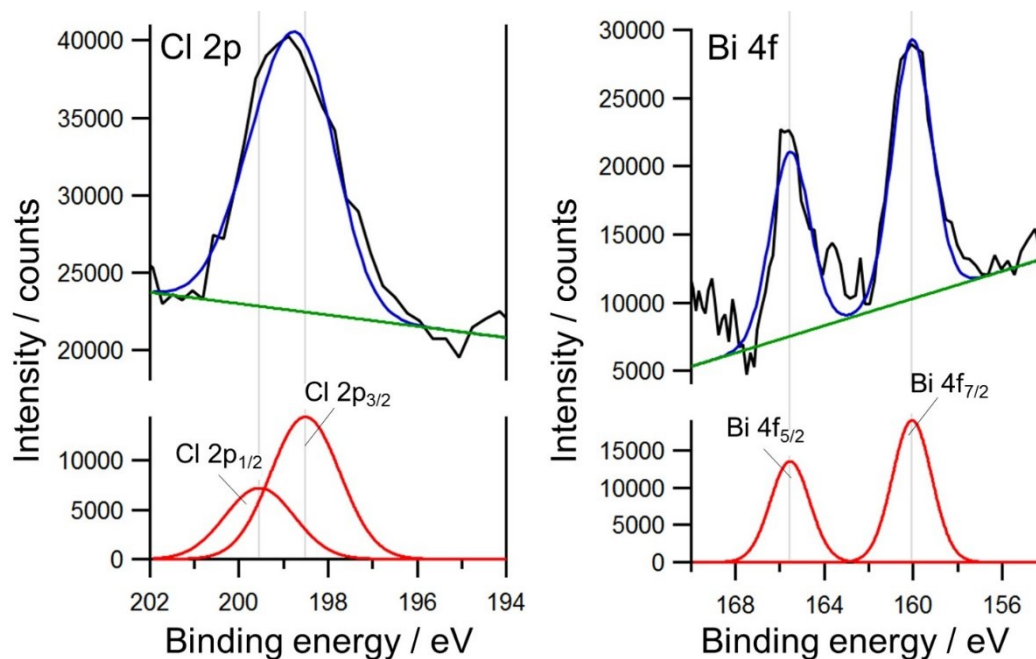

**Fig. S6** EUPS spectra of BaBi<sub>5</sub>Ti<sub>3</sub>O<sub>14</sub>Cl (**Ba-3**). (left) Cl 2p (Cl 2p<sub>1/2</sub> area: 14038; Cl 2p<sub>3/2</sub> area: 28076; total area: 42114) and (right) Bi 4f (Bi 4f<sub>5/2</sub> area: 29932; Bi 4f<sub>7/2</sub> area: 42096; total area: 72028).

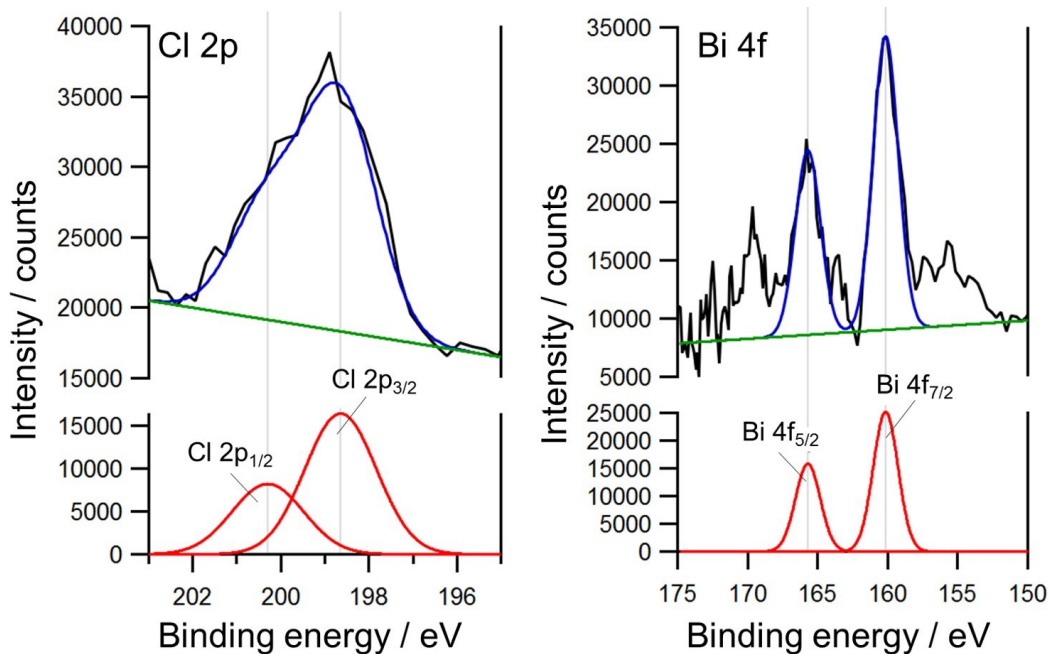

**Fig. S7** EUPS spectra of  $\text{Ba}_2\text{Bi}_5\text{Ti}_4\text{O}_{17}\text{Cl}$  (**Ba-4**). (left) Cl 2p (Cl  $2p_{1/2}$  area: 16714; Cl  $2p_{3/2}$  area: 33428; total area: 50142) and (right) Bi 4f (Bi  $4f_{5/2}$  area: 35083; Bi  $4f_{7/2}$  area: 55879; total area: 90962).

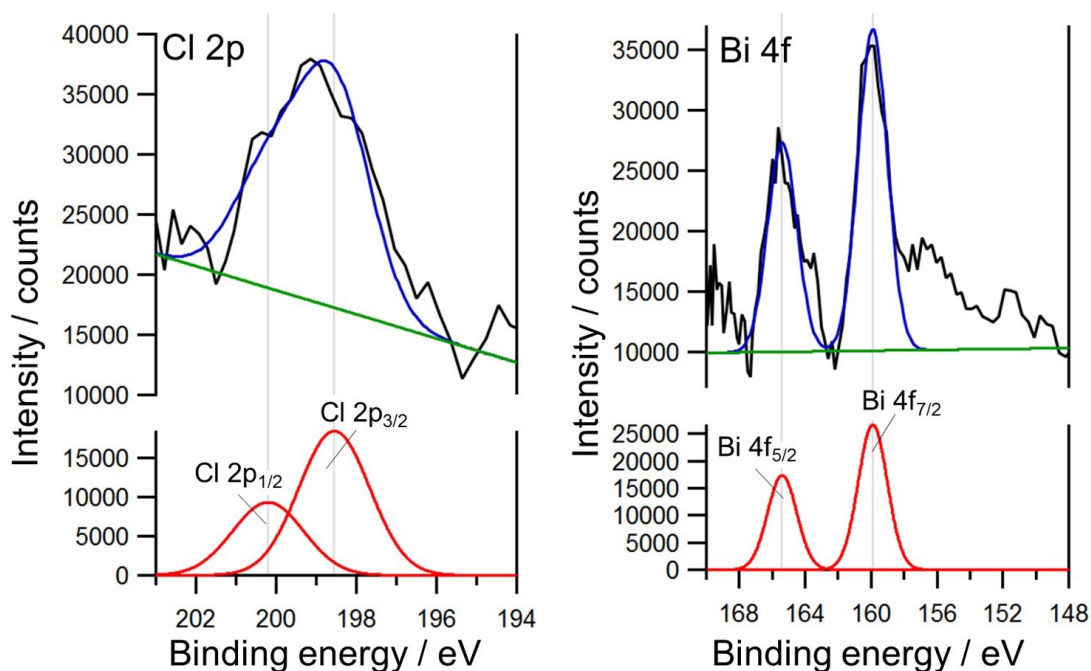

**Fig. S8** EUPS spectra of  $\text{Ba}_3\text{Bi}_5\text{Ti}_5\text{O}_{20}\text{Cl}$  (**Ba-5**). (left) Cl 2p (Cl  $2p_{1/2}$  area: 20578; Cl  $2p_{3/2}$  area: 40659; total area: 61237) and (right) Bi 4f (Bi  $4f_{5/2}$  area: 38422; Bi  $4f_{7/2}$  area: 58970; total area: 97392).

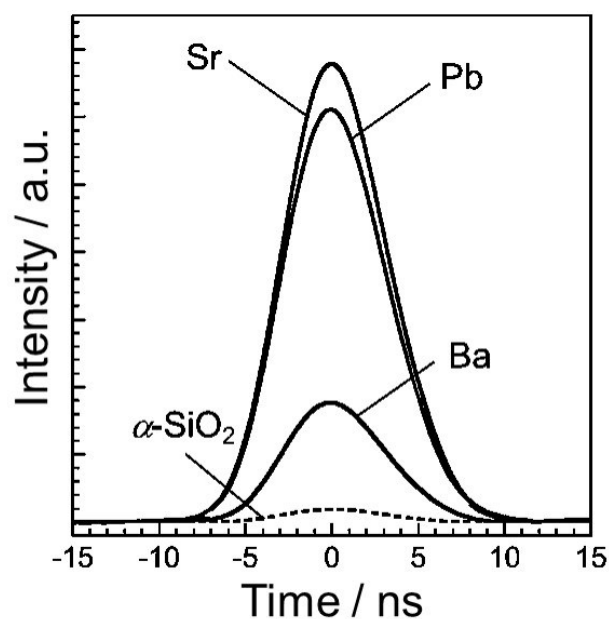

**Fig. S9** SHG intensities for BaBi<sub>5</sub>Ti<sub>3</sub>O<sub>14</sub>Cl (**Ba-3**). Bi<sub>5</sub>MTi<sub>3</sub>O<sub>14</sub>Cl ( $M = \text{Sr, Pb}$ ) and  $\alpha$ -SiO<sub>2</sub> are references.

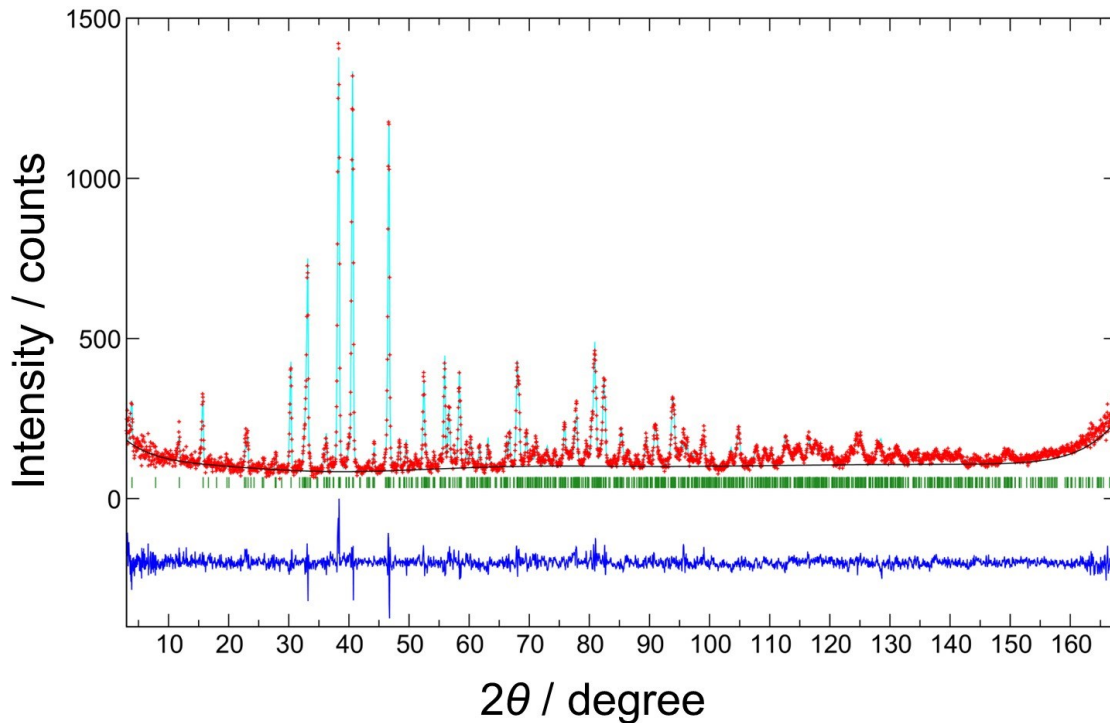

**Fig. S10** Final Rietveld plot for BaBi<sub>5</sub>Ti<sub>3</sub>O<sub>14</sub>Cl (**Ba-3**) using the NPD pattern collected at room temperature;  $R_p = 0.0754$ ,  $R_{wp} = 0.0966$ ,  $R_B = 0.0713$ ,  $R_F = 0.0310$ ,  $\chi^2 = 1.171$ .



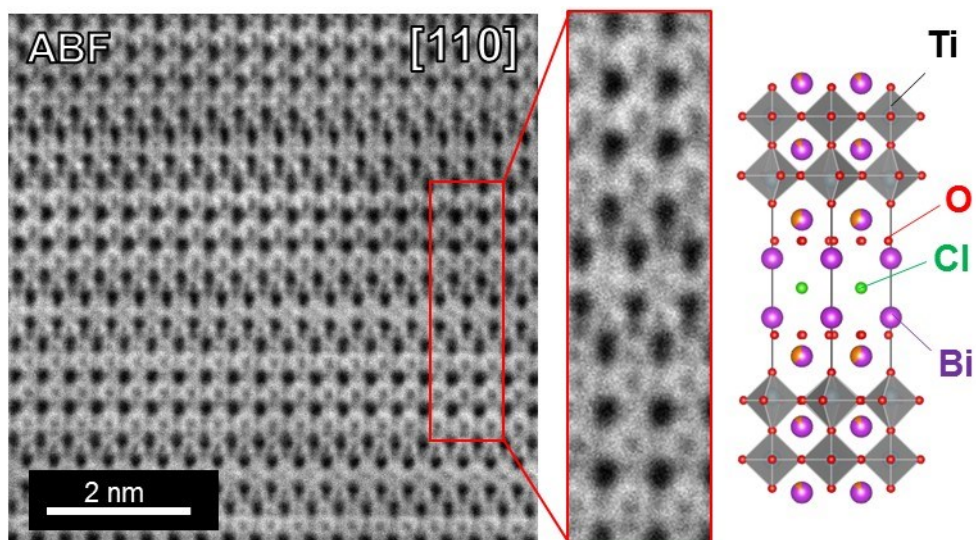

**Fig. S11** ABF-STEM images of  $\text{BaBi}_5\text{Ti}_3\text{O}_{14}\text{Cl}$  (**Ba-3**) in the direction of  $[110]$ .

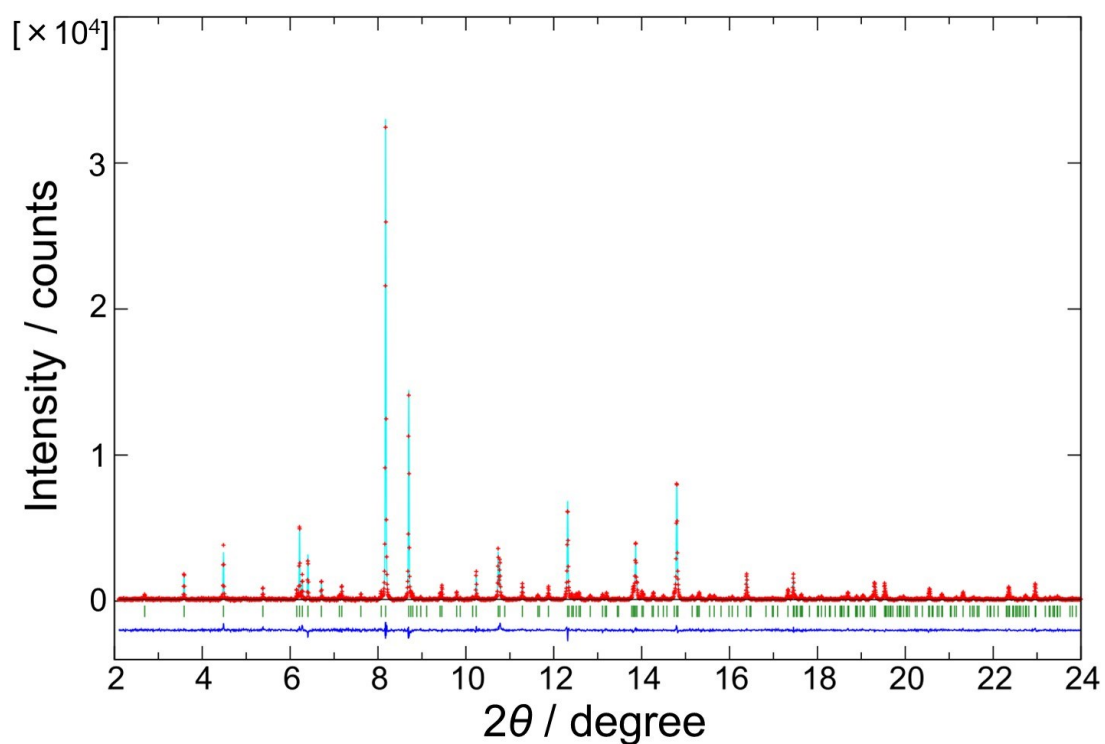

**Fig. S12** Final Rietveld plot for  $\text{Ba}_2\text{Bi}_5\text{Ti}_4\text{O}_{17}\text{Cl}$  (**Ba-4**) using the SXRD pattern collected at room temperature;  $R_p = 0.1184$ ,  $R_{wp} = 0.1761$ ,  $R_B = 0.0620$ ,  $R_F = 0.0526$ ,  $\chi^2 = 2.884$ .

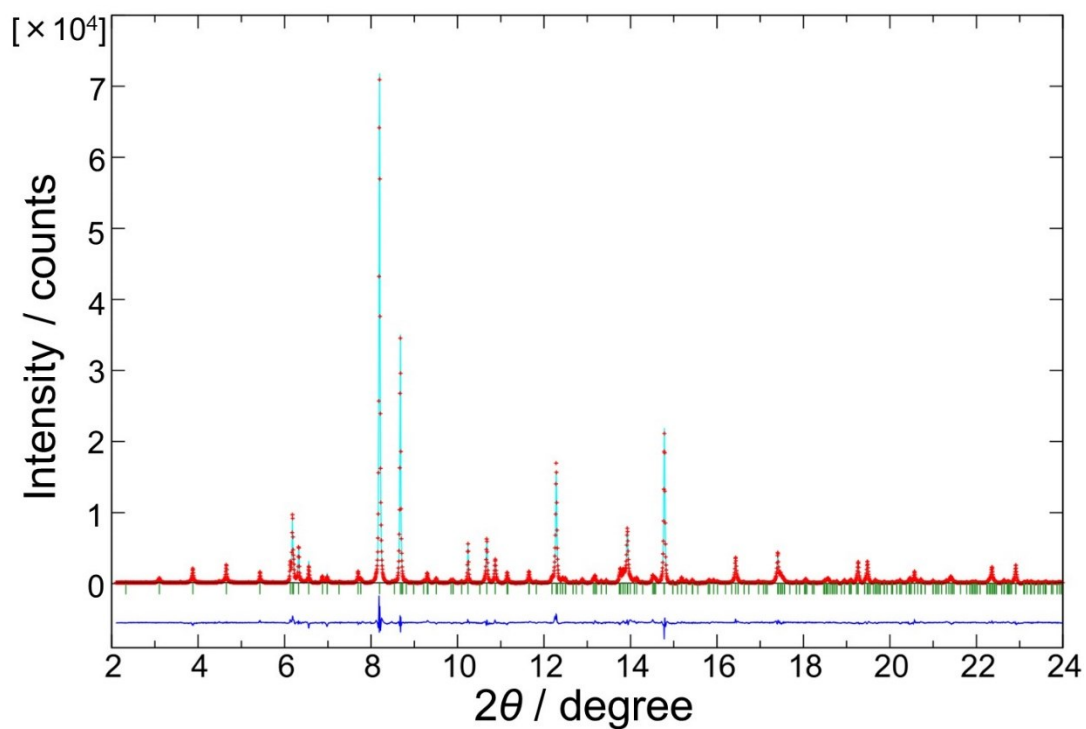

**Fig. S13** Final Rietveld plot for  $\text{Ba}_3\text{Bi}_5\text{Ti}_5\text{O}_{20}\text{Cl}$  (**Ba-5**) using the SXRD pattern collected at room temperature;  $R_p = 0.0944$ ,  $R_{wp} = 0.1437$ ,  $R_B = 0.0468$ ,  $R_F = 0.0365$ ,  $\chi^2 = 3.609$ .

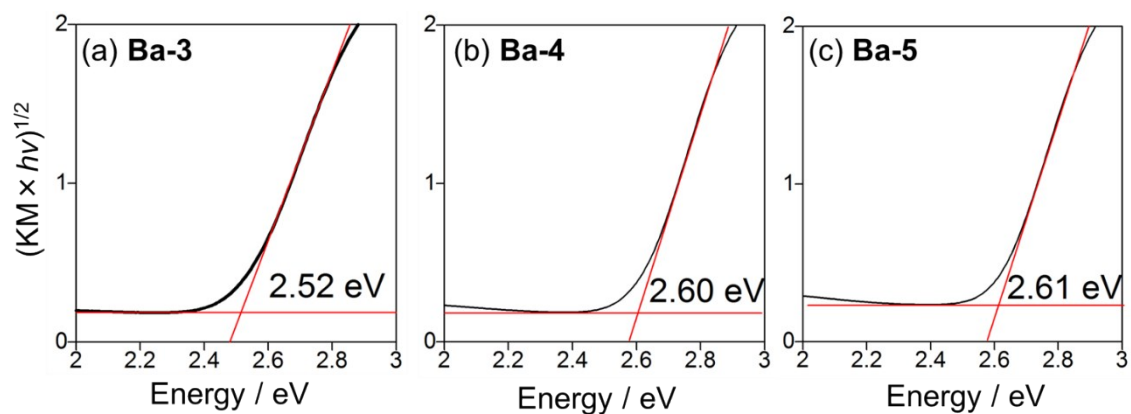

**Fig. S14** Tauc plots of (a)  $\text{BaBi}_5\text{Ti}_3\text{O}_{14}\text{Cl}$  (**Ba-3**), (b)  $\text{Ba}_2\text{Bi}_5\text{Ti}_4\text{O}_{17}\text{Cl}$  (**Ba-4**) and (c)  $\text{Ba}_3\text{Bi}_5\text{Ti}_5\text{O}_{20}\text{Cl}$  (**Ba-5**).

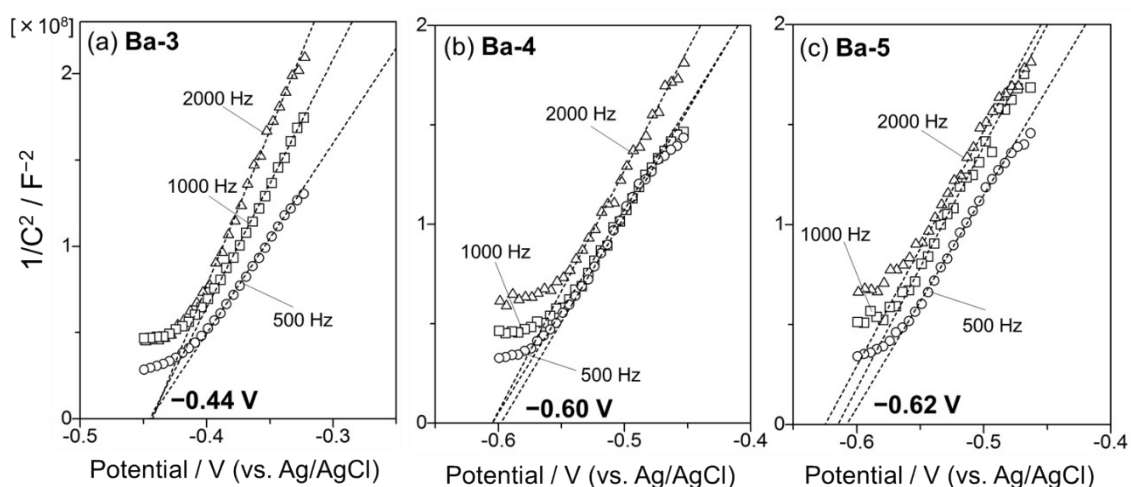

**Fig. S15** Mott-Schottky plots of (a)  $\text{BaBi}_5\text{Ti}_3\text{O}_{14}\text{Cl}$  (**Ba-3**), (b)  $\text{Ba}_2\text{Bi}_5\text{Ti}_4\text{O}_{17}\text{Cl}$  (**Ba-4**) and (c)  $\text{Ba}_3\text{Bi}_5\text{Ti}_5\text{O}_{20}\text{Cl}$  (**Ba-5**) collected in an aqueous  $\text{Na}_2\text{SO}_4$  solution (0.1 M, pH 2.0, adjusted by 0.5 M  $\text{H}_2\text{SO}_4$ ) with the amplitude and frequency were set to 10 mV and 500, 1000, 2000 Hz, respectively.

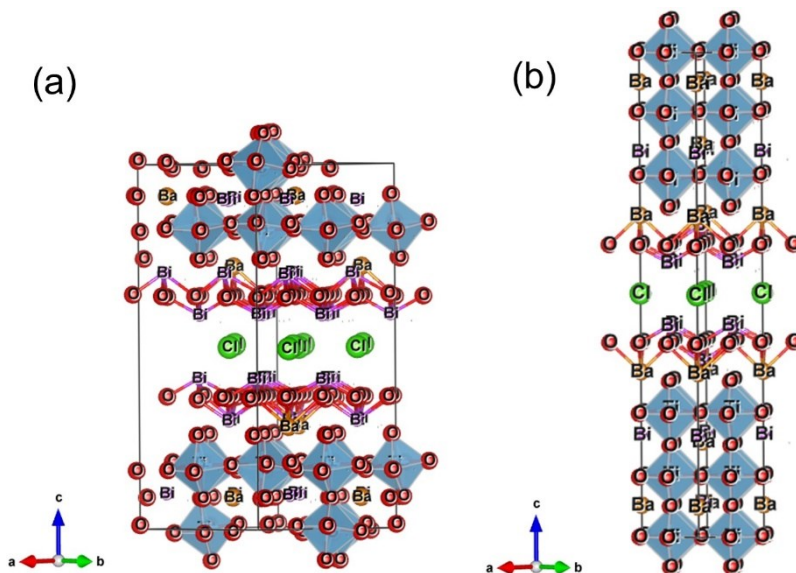

**Fig. S16** Structural models employed for the DFT calculation; (a) 192-atom supercell of  $\text{BaBi}_5\text{Ti}_3\text{O}_{14}\text{Cl}$  (**Ba-3**) and (b) 68-atom supercell of  $\text{Ba}_3\text{Bi}_5\text{Ti}_5\text{O}_{20}\text{Cl}$  (**Ba-5**).

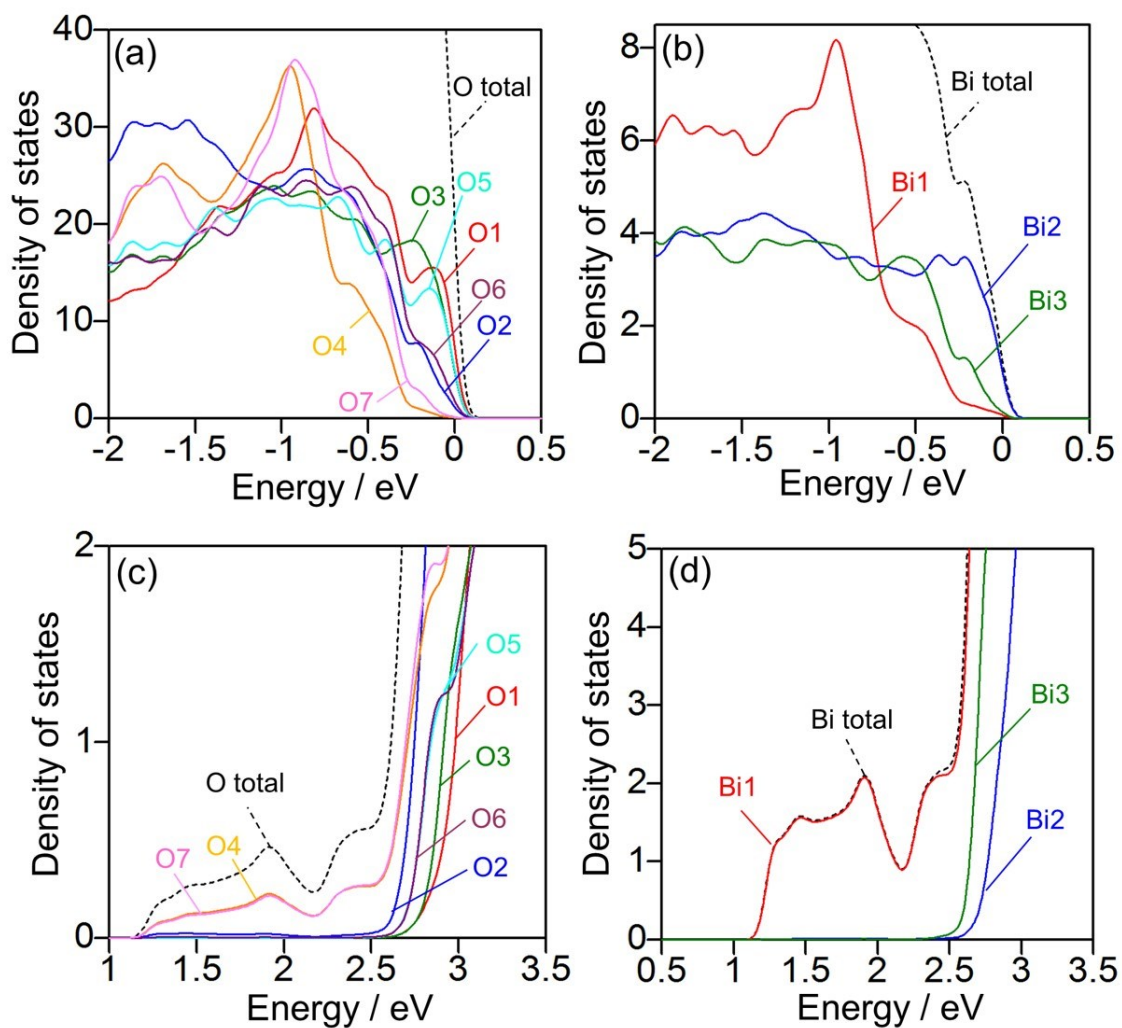

**Fig. S17** PDOS around the VBM from (a) each O site and (b) Bi site, and around the CBM from (c) each O site and (d) Bi site in BaBi<sub>5</sub>Ti<sub>3</sub>O<sub>14</sub>Cl (**Ba-3**). See Fig. 5 for the detailed labelling.

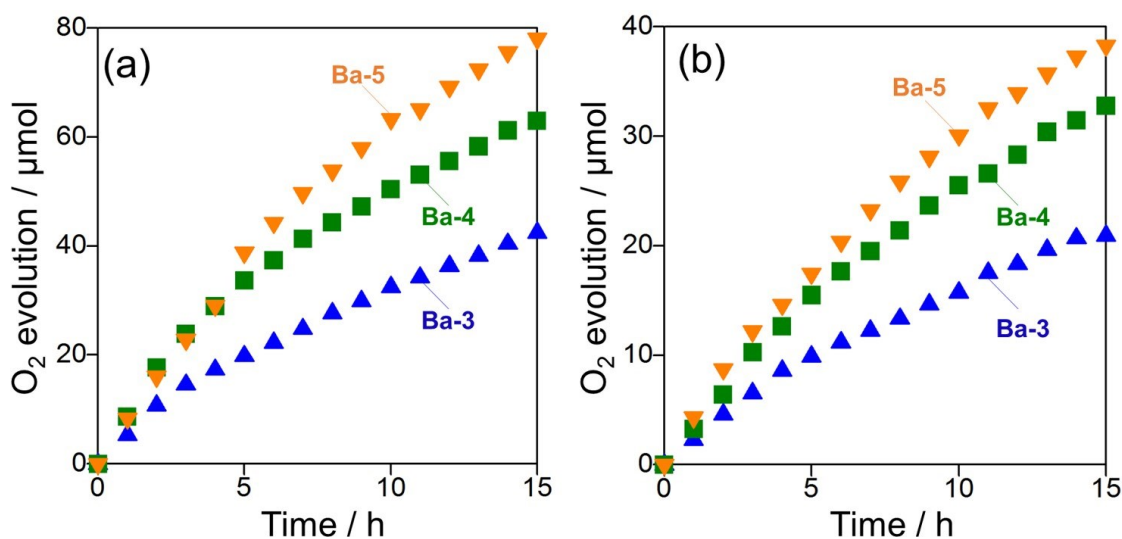

**Fig. S18** Time courses of photocatalytic O<sub>2</sub> evolution on 100 mg of BaBi<sub>5</sub>Ti<sub>3</sub>O<sub>14</sub>Cl (**Ba-3**), Ba<sub>2</sub>Bi<sub>5</sub>Ti<sub>4</sub>O<sub>17</sub>Cl (**Ba-4**) and Ba<sub>3</sub>Bi<sub>5</sub>Ti<sub>5</sub>O<sub>20</sub>Cl (**Ba-5**) photocatalysts under visible light (400 <  $\lambda$  < 800 nm) in aqueous solutions of (a) AgNO<sub>3</sub> (10 mM, 120 mL) and (b) Fe(ClO<sub>4</sub>)<sub>3</sub> (5 mM, 120 mL, pH 2.3, adjusted by HClO<sub>4</sub>).

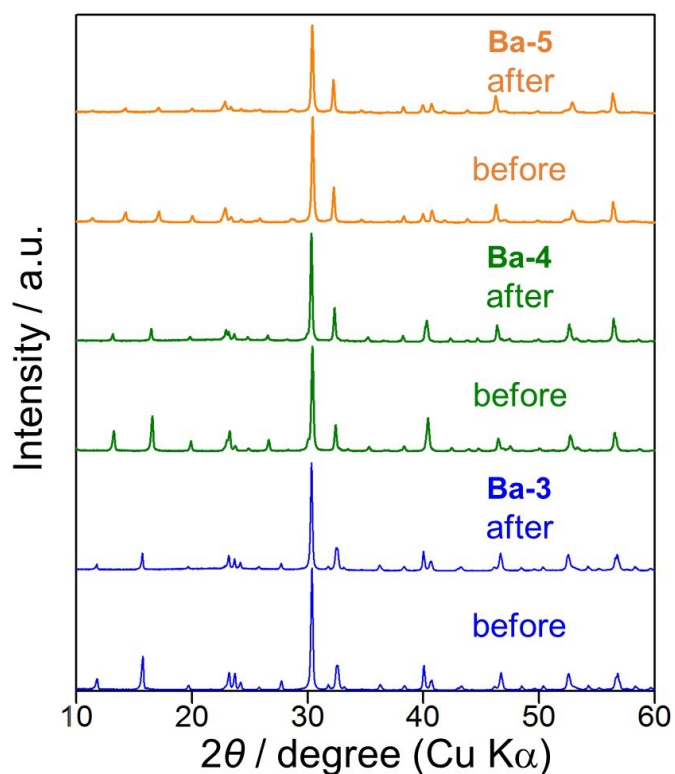

**Fig. S19** XRD patterns of BaBi<sub>5</sub>Ti<sub>3</sub>O<sub>14</sub>Cl (**Ba-3**), Ba<sub>2</sub>Bi<sub>5</sub>Ti<sub>4</sub>O<sub>17</sub>Cl (**Ba-4**) and Ba<sub>3</sub>Bi<sub>5</sub>Ti<sub>5</sub>O<sub>20</sub>Cl (**Ba-5**) before and after photocatalytic O<sub>2</sub> evolution in an Fe(ClO<sub>4</sub>)<sub>3</sub> aqueous solution under visible light.

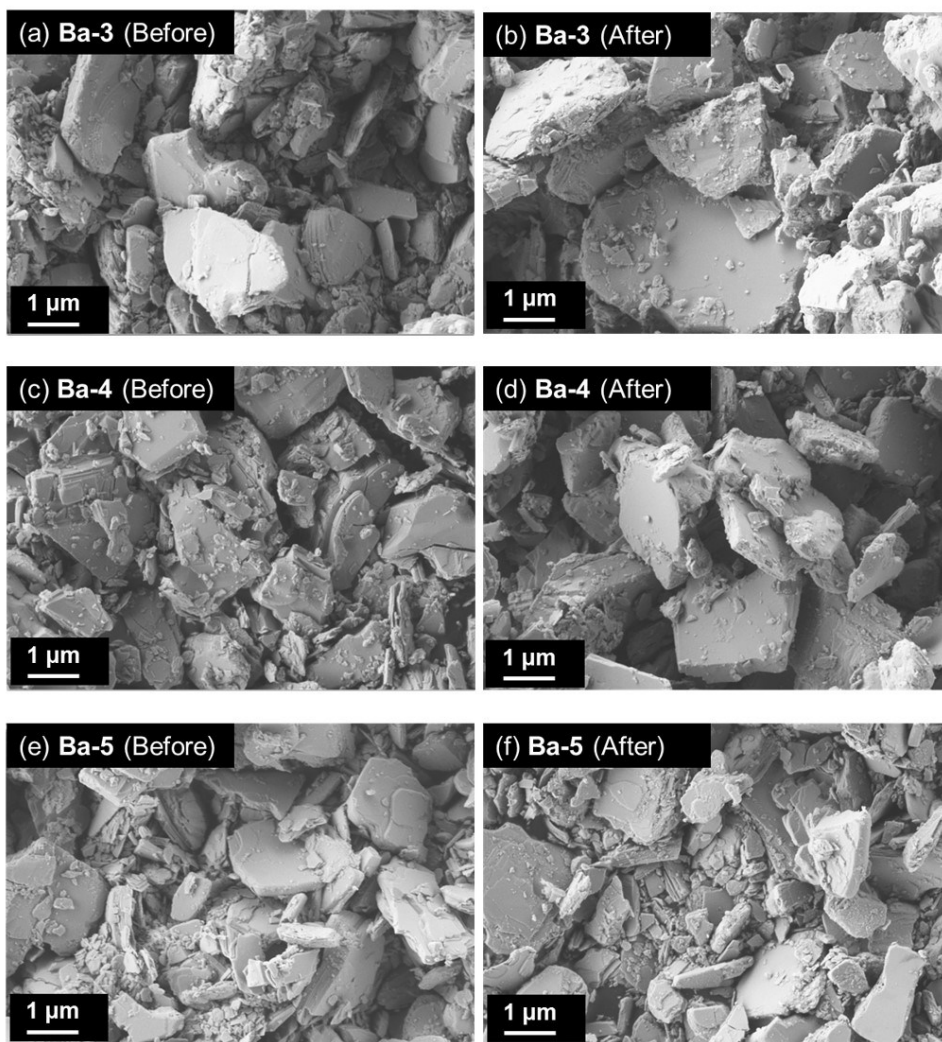

**Fig. S20** SEM images of  $\text{BaBi}_5\text{Ti}_3\text{O}_{14}\text{Cl}$  (**Ba-3**),  $\text{Ba}_2\text{Bi}_5\text{Ti}_4\text{O}_{17}\text{Cl}$  (**Ba-4**) and  $\text{Ba}_3\text{Bi}_5\text{Ti}_5\text{O}_{20}\text{Cl}$  (**Ba-5**) before and after photocatalytic  $\text{O}_2$  evolution in an  $\text{Fe}(\text{ClO}_4)_3$  aqueous solution under visible light.

**Table S1** Final refined structure parameters for BaBi<sub>5</sub>Ti<sub>3</sub>O<sub>14</sub>Cl (**Ba-3**)<sup>a</sup>

| Atom   | Site | x              | y         | z          | g                            | 100U / Å <sup>2</sup> | BVS              |
|--------|------|----------------|-----------|------------|------------------------------|-----------------------|------------------|
| Bi/Ba1 | 4c   | 0.031(3)       | -0.000(3) | 0.41350(9) | Bi: 1                        | 1.13(5)               | 3.1 <sup>e</sup> |
| Bi/Ba2 | 4c   | 0 <sup>b</sup> | 0.497(3)  | 0.0956(10) | Bi: 0.874(2)<br>Ba: 0.126(2) | 2.56(7)               | 2.4 <sup>e</sup> |
| Bi/Ba3 | 4c   | 0.038(14)      | 0.495(2)  | 0.3008(11) | Bi: 0.626(2)<br>Ba: 0.374(2) | 2.55(7)               | 2.2 <sup>e</sup> |
| Ti1    | 2a   | 0.018(8)       | 0         | 0          | 1                            | 0.3(2) <sup>c</sup>   | 3.9              |
| Ti2    | 4c   | 0.009(6)       | -0.00(11) | 0.1843(4)  | 1                            | 0.3(2) <sup>c</sup>   | 4.2              |
| Cl1    | 2b   | 0.026(4)       | 1/2       | 1/2        | 1                            | 1.8(14)               | -                |
| O1     | 4c   | -0.014(3)      | -0.035(3) | 0.0896(5)  | 1                            | 2.54(7) <sup>d</sup>  | -                |
| O2     | 4c   | 0.050(4)       | 0.023(4)  | 0.2623(4)  | 1                            | 2.54(7) <sup>d</sup>  | -                |
| O3     | 4c   | 0.293(3)       | 0.218(4)  | 0.004(11)  | 1                            | 2.54(7) <sup>d</sup>  | -                |
| O4     | 4c   | 0.281(5)       | 0.245(9)  | 0.3646(9)  | 1                            | 2.54(7) <sup>d</sup>  | -                |
| O5     | 4c   | 0.319(4)       | 0.222(4)  | 0.1688(8)  | 1                            | 2.54(7) <sup>d</sup>  | -                |
| O6     | 4c   | 0.775(4)       | 0.734(6)  | 0.1773(7)  | 1                            | 2.54(7) <sup>d</sup>  | -                |
| O7     | 4c   | 0.783(5)       | 0.744(8)  | 0.363(10)  | 1                            | 2.54(7) <sup>d</sup>  | -                |

<sup>a</sup>Space group *P2an* (#30), orthorhombic, *a* = 5.50525(6) Å, *b* = 5.48057(5) Å, *c* = 22.4870(2) Å, *V* = 678.49(12) Å<sup>3</sup>. <sup>b</sup>Fixed to define origin of polar axis. <sup>c</sup>Constrained to be equivalent to Ti1. <sup>d</sup>Constrained to be equivalent to O1. <sup>e</sup>Calculated by using bond valence parameter of Bi<sup>3+</sup>.

**Table S2** Bond lengths of BaBi<sub>5</sub>Ti<sub>3</sub>O<sub>14</sub>Cl (**Ba-3**)

| Bond    | Bond length / Å                            |
|---------|--------------------------------------------|
| Ti1–O1  | 2.032(13) × 2                              |
| Ti1–O3  | 1.93(4)×2, 1.98(4) × 2                     |
| Ti2–O1  | 2.140(16)                                  |
| Ti2–O2  | 1.770(14)                                  |
| Ti2–O5  | 1.89(6), 2.13(5)                           |
| Ti2–O6  | 1.95(6), 1.95(6)                           |
| Bi1–O4  | 2.22(4), 2.25(4)                           |
| Bi1–O7  | 2.23(1), 2.26(1)                           |
| Bi1–Cl1 | 3.349(17), 3.360(14), 3.361(14), 3.392(18) |
| Bi2–O1  | 2.57(3), 2.685(18), 2.842(18), 2.92(3)     |
| Bi2–O3  | 2.64(3), 2.78(3), 3.04(3), 3.17(3)         |
| Bi2–O5  | 2.27(3), 2.84(3)                           |
| Bi2–O6  | 2.57(3), 2.84(3)                           |
| Bi3–O2  | 2.82(3), 2.847(14), 2.902(14), 2.95(3)     |
| Bi3–O4  | 2.39(4), 2.41(4)                           |
| Bi3–O7  | 2.42(4), 2.41(4)                           |



**Table S3** Final refined structure parameters for Ba<sub>2</sub>Bi<sub>5</sub>Ti<sub>4</sub>O<sub>17</sub>Cl (**Ba-4**)<sup>a</sup>

| Atom   | Sit | x   | y   | z                                | g                            | 100U / Å <sup>2</sup> | BVS              |
|--------|-----|-----|-----|----------------------------------|------------------------------|-----------------------|------------------|
| Bi/Ba1 | 2h  | 1/2 | 1/2 | 0.4267(12)                       | Bi: 1                        | 1.01(6)               | 3.5 <sup>c</sup> |
| Bi/Ba2 | 2g  | 0   | 0   | Bi2: 0.3385(2)<br>Ba2: 0.3133(6) | Bi: 0.670(3)<br>Ba: 0.330(3) | 1.7(10)               | 2.1 <sup>c</sup> |
| Bi/Ba3 | 2g  | 0   | 0   | Bi3: 0.1669(3)<br>Ba3: 0.1505(5) | Bi: 0.574(3)<br>Ba: 0.426(3) | 2.4(11)               | 2.5 <sup>c</sup> |
| Bi/Ba4 | 1a  | 0   | 0   | 0                                | Bi: 0.512(3)<br>Ba: 0.488(3) | 3.5(2)                | 2.1 <sup>c</sup> |
| Ti1    | 2h  | 1/2 | 1/2 | 0.2364(5)                        | 1                            | 1.1(3)                | 4.2              |
| Ti2    | 2h  | 1/2 | 1/2 | 0.0769(6)                        | 1                            | 0.9(3)                | 3.7              |
| Cl1    | 1b  | 0   | 0   | 1/2                              | 1                            | 2.4(7)                | -                |
| O1     | 4i  | 0   | 1/2 | 0.391(12)                        | 1                            | 1.2(3) <sup>b</sup>   | -                |
| O2     | 2h  | 1/2 | 1/2 | 0.298(2)                         | 1                            | 1.2(3) <sup>b</sup>   | -                |
| O3     | 4i  | 0   | 1/2 | 0.220(11)                        | 1                            | 1.2(3) <sup>b</sup>   | -                |
| O4     | 2h  | 1/2 | 1/2 | 0.153(2)                         | 1                            | 1.2(3) <sup>b</sup>   | -                |
| O5     | 4i  | 0   | 1/2 | 0.070(11)                        | 1                            | 1.2(3) <sup>b</sup>   | -                |
| O6     | 1c  | 1/2 | 1/2 | 0                                | 1                            | 1.2(3) <sup>b</sup>   | -                |

<sup>a</sup>Space group *P4/mmm* (#123), tetragonal,  $a = b = 3.91036(4)$  Å,  $c = 26.8125(4)$  Å,  $V = 409.988(9)$  Å<sup>3</sup>. <sup>b</sup>Constrained to be equivalent to O1. <sup>c</sup>Calculated by using bond valence parameter of Bi<sup>3+</sup>.

**Table S4** Final refined structure parameters for Ba<sub>3</sub>Bi<sub>5</sub>Ti<sub>5</sub>O<sub>20</sub>Cl (**Ba-5**)<sup>a</sup>

| Atom   | Site | x   | y   | z               | g            | 100U / Å <sup>2</sup> | BVS              |
|--------|------|-----|-----|-----------------|--------------|-----------------------|------------------|
| Bi/Ba1 | 2h   | 1/2 | 1/2 | 0.43608(7)      | Bi: 1        | 2.15(6)               | 3.2 <sup>d</sup> |
| Bi/Ba2 | 2g   | 0   | 0   | Bi2: 0.3611(11) | Bi: 0.573(4) | 2.20(10)              | 2.4 <sup>d</sup> |
|        |      |     |     | Ba2: 0.3413(3)  | Ba: 0.427(4) |                       |                  |
| Bi/Ba3 | 2g   | 0   | 0   | Bi3: 0.2042(2)  | Bi: 0.489(4) | 2.03(9)               | 2.0 <sup>d</sup> |
|        |      |     |     | Ba3: 0.2167(3)  | Ba: 0.511(4) |                       |                  |
| Bi/Ba4 | 2g   | 0   | 0   | Bi4: 0.0629(2)  | Bi: 0.438(4) | 2.96(9)               | 2.0 <sup>d</sup> |
|        |      |     |     | Ba4: 0.0753(2)  | Ba: 0.562(4) |                       |                  |
| Ti1    | 2h   | 1/2 | 1/2 | 0.2725(3)       | 1            | 0.6(2) <sup>b</sup>   | 4.4              |
| Ti2    | 2h   | 1/2 | 1/2 | 0.1343(3)       | 1            | 0.6(2) <sup>b</sup>   | 4.1              |
| Ti3    | 1c   | 1/2 | 1/2 | 0               | 1            | 0.6(2) <sup>b</sup>   | 4.3              |
| Cl1    | 1b   | 0   | 0   | 1/2             | 1            | 1.8(5)                | -                |
| O1     | 4i   | 0   | 1/2 | 0.4029(7)       | 1            | 0.8(2) <sup>c</sup>   | -                |
| O2     | 2h   | 1/2 | 1/2 | 0.323(10)       | 1            | 0.8(2) <sup>c</sup>   | -                |
| O3     | 4i   | 0   | 1/2 | 0.2566(7)       | 1            | 0.8(2) <sup>c</sup>   | -                |
| O4     | 2h   | 1/2 | 1/2 | 0.191(11)       | 1            | 0.8(2) <sup>c</sup>   | -                |
| O5     | 4i   | 0   | 1/2 | 0.1261(7)       | 1            | 0.8(2) <sup>c</sup>   | -                |
| O6     | 2h   | 1/2 | 1/2 | 0.061(11)       | 1            | 0.8(2) <sup>c</sup>   | -                |
| O7     | 2f   | 0   | 1/2 | 0               | 1            | 0.8(2) <sup>c</sup>   | -                |

<sup>a</sup>Space group *P4/mmm* (#123), tetragonal,  $a = b = 3.92036(4)$  Å,  $c = 30.9881(7)$  Å,  $V = 476.26(12)$  Å<sup>3</sup>. <sup>b</sup>Constrained to be equivalent to Ti1. <sup>c</sup>Constrained to be equivalent to O1.

<sup>d</sup>Calculated by using bond valence parameter of Bi<sup>3+</sup>.

**Table S5** Bond lengths of Ba<sub>2</sub>Bi<sub>5</sub>Ti<sub>4</sub>O<sub>17</sub>Cl (**Ba-4**) and Ba<sub>3</sub>Bi<sub>5</sub>Ti<sub>5</sub>O<sub>20</sub>Cl (**Ba-5**)

| Bond    | Bond length / Å |                |
|---------|-----------------|----------------|
|         | Ba-4            | Ba-5           |
| Ti1–O2  | 1.66(5)         | 1.57(4)        |
| Ti1–O3  | 2.004(8) × 4    | 2.001(6) × 4   |
| Ti1–O4  | 2.24(5)         | 2.53(4)        |
| Ti2–O4  | 2.04(5)         | 1.76(4)        |
| Ti2–O5  | 1.963(4) × 4    | 1.977(3)       |
| Ti2–O6  | 2.061(16)       | 2.26(4)        |
| Ti3–O6  | -               | 1.90(4)        |
| Ti3–O7  | -               | 1.960          |
| Bi1–Cl1 | 3.3920(19) × 4  | 3.4071(13) × 4 |
| Bi1–O1  | 2.176(15) × 4   | 2.214(10) × 4  |
| Bi2–O1  | 2.411(19) × 4   | 2.348(12) × 4  |
| Ba2–O1  | 2.86(3) × 4     | 2.736(16) × 4  |
| Bi2–O2  | 2.966(16) × 4   | 3.011(13) × 4  |
| Ba2–O2  | 2.794(7) × 4    | 2.828(7) × 4   |
| Bi3–O3  | 2.418(18) × 4   | 2.546(14) × 4  |
| Ba3–O3  | 2.70(3) × 4     | 2.317(12) × 4  |
| Bi3–O4  | 2.791(6) × 4    | 2.802(5) × 4   |
| Ba3–O4  | 2.7657(10) × 4  | 2.885(10) × 4  |
| Bi3–O5  | 3.25(3) × 4     | 3.113(17) × 4  |
| Ba3–O5  | 2.91(3) × 4     | 3.424(18) × 4  |
| Bi4–O5  | 2.72(3) × 4     | 2.771(15) × 4  |
| Bi4–O6  | 2.76504(3) × 4  | 2.7726(6) × 4  |
| Bi4–O7  | -               | 2.765(4) × 4   |
| Bi4–O5  | -               | 2.516(14) × 4  |
| Bi4–O6  | -               | 2.806(6) × 4   |
| Bi4–O7  | -               | 3.046(6) × 4   |

**Table S6** Comparison between calculated and experimental band gaps of **Ba-3** and **Ba-5**

| Material | Band gap / eV              |              |
|----------|----------------------------|--------------|
|          | DFT (GGA-PBE)              | Experimental |
| Ba-3     | 1.20 (-52.4%) <sup>a</sup> | 2.52         |
| Ba-5     | 0.55 (-78.9%) <sup>a</sup> | 2.61         |

<sup>a</sup>Error to the experimental value

**Table S7** Comparison between calculated and experimental lattice parameters of **Ba-3** and **Ba-5**

| Ba-3         | <i>a</i> / Å               | <i>b</i> / Å               | <i>c</i> / Å               |
|--------------|----------------------------|----------------------------|----------------------------|
| DFT          | 11.27 (+2.4%) <sup>a</sup> | 11.17 (+1.9%) <sup>a</sup> | 22.66 (+0.8%) <sup>a</sup> |
| Experimental | 11.01                      | 10.96                      | 22.49                      |

  

| Ba-5         | <i>a</i> / Å             | <i>b</i> / Å             | <i>c</i> / Å              |
|--------------|--------------------------|--------------------------|---------------------------|
| DFT          | 5.61 (1.3%) <sup>a</sup> | 5.61 (1.3%) <sup>a</sup> | 31.52 (1.7%) <sup>a</sup> |
| Experimental | 5.54                     | 5.54                     | 30.99                     |

<sup>a</sup>Error to the experimental value
